# Supplementary material for: Rate-Optimal Online Learning for Dynamic Assortment Selection with Positioning
Source: Atypon-hosted journal article supplement (doi:10.1287/opre.2024.1556), 2025-08-11
Supplement: opre.2024.1556.cd.zip [file README.pdf › Code_Data/README.pdf]

## # Introduction

The code is for our submission 'Rate-Optimal Online Learning for Dynamic Assortment Selection with Positioning'.

## # File structure:

|—— README.md # The file you are reading now describes the file structure and how to use the code.

|—— requirement.txt # The file contains the environment of python for our codes.

### |—— Methods - Folder

(1) Pre\_Functions.py - This Python file prepares and contains functions used to define the main policies.

(2) TLR\_UCB.py - This Python file contains codes for the proposed TLR-UCB policy.

(3) EI\_TLR.py - This Python file contains codes for the proposed EI-TLR policy.

(4) EI\_TLR\_Explore.py - This Python file contains codes for the exploration and joint estimation part of the proposed EI-TLR policy.

(5) LR\_UCB.py - This Python file contains codes for the LR-UCB policy.

(6) A\_UCB\_V.py - This Python file contains codes for the A-UCB-V policy.

(7) A\_UCB.py - This Python file contains codes for the A-UCB policy.

(8) S\_ETC.py - This Python file contains codes for the S-ETC policy.

(9) Sub\_Gap.py - This Python file contains the function that computes suboptimality gaps for DAP instances.

### |—— Simulation - Folder

General structure: This folder contains Python files that produce results through simulations; these results are saved in the "Results" subfolder; these results are then used by "Plot..." Python files to produce Figures in the main paper and Appendix. In the following, we present the details based on the 'code-results-plot' relationships.

(1) "Ex1\_Known.py" implements TLR-UCB, LR-UCB and A-UCB-V policies on Example 1. It produces the results "TLR-UCB\_Ex1\_reg\_mean\_1.npy", "LR-UCB\_Ex1\_reg\_mean\_1.npy", "A-UCB-V\_Ex1\_reg\_mean\_1.npy", saved in the "Results" subfolder, and then used by "Plot\_Ex1\_Known.py" to produce the left panel of Figure 1 in the main paper.

(2) "Ex2\_Known.py" implements TLR-UCB, LR-UCB and A-UCB-V policies on Example 2. It produces the results "TLR-UCB\_Ex2\_reg\_mean\_1.npy", "LR-UCB\_Ex2\_reg\_mean\_1.npy", "A-UCB-V\_Ex2\_reg\_mean\_1.npy", saved in the "Results" subfolder, and then used by "Plot\_Ex2\_Known.py" to produce the middle panel of Figure 1 in the main paper.

(3) "Ex3\_Known.py" implements TLR-UCB, LR-UCB and A-UCB-V policies on Example 3. It produces the results "TLR-UCB\_Ex3\_reg\_mean\_1.npy", "LR-UCB\_Ex3\_reg\_mean\_1.npy", "A-UCB-V\_Ex3\_reg\_mean\_1.npy", saved in the "Results" subfolder, and then used by "Plot\_Ex3\_Known.py" to produce the right panel of Figure 1 in the main paper.

(4) "Ex1\_Unknown.py" implements EI-TLR, A-UCB and S-ETC policies on Example 1. It produces the results "EI-TLR\_Ex1\_reg\_mean\_1.npy", "A-UCB\_Ex1\_reg\_mean\_1.npy", "S-

ETC\_Ex1\_reg\_mean\_1.npy", saved in the "Results" subfolder, and then used by "Plot\_Ex1\_Unknown.py" to produce the left panel of Figure 2 in the main paper.

(5) "Ex2\_Unknown.py" implements EI-TLR, A-UCB and S-ETC policies on Example 2. It produces the results "EI-TLR\_Ex2\_reg\_mean\_1.npy", "A-UCB\_Ex2\_reg\_mean\_1.npy", "S-ETC\_Ex2\_reg\_mean\_1.npy", saved in the "Results" subfolder, and then used by "Plot\_Ex2\_Unknown.py" to produce the middle panel of Figure 2 in the main paper.

(6) "Ex3\_Unknown.py" implements EI-TLR, A-UCB and S-ETC policies on Example 3. It produces the results "EI-TLR\_Ex3\_reg\_mean\_1.npy", "A-UCB\_Ex3\_reg\_mean\_1.npy", "S-ETC\_Ex3\_reg\_mean\_1.npy", saved in the "Results" subfolder, and then used by "Plot\_Ex3\_Unknown.py" to produce the right panel of Figure 2 in the main paper.

(7) "Ex1\_Sensitivity.py" implements TLR-UCB on Example 1, with varying values of the parameter  $\nu_{\{0\}}$ . It also implements LR-UCB and A-UCB-V on Example 1. It produces the results "TLR-UCB\_Ex1\_reg\_mean\_Sen\_1.npy", "TLR-UCB\_Ex1\_reg\_mean\_Sen\_2.npy", "TLR-UCB\_Ex1\_reg\_mean\_Sen\_3.npy", "LR-UCB\_Ex1\_reg\_mean\_Sen\_1.npy", "A-UCB-V\_Ex1\_reg\_mean\_Sen\_1.npy", saved in the "Results" subfolder, and then used by "Plot\_Ex1\_Sensitivity.py" to produce Figure 1 in the Appendix.

(8) "Ex4\_Gap" implements TLR-UCB on varying settings in Example 4. It produces the results "TLR-UCB\_Ex4\_reg\_mean\_1.npy", "TLR-UCB\_Ex4\_reg\_mean\_2.npy", "TLR-UCB\_Ex4\_reg\_mean\_3.npy", "TLR-UCB\_Ex4\_reg\_mean\_4.npy", "TLR-UCB\_Ex4\_reg\_mean\_5.npy", saved in the "Results" subfolder, and then used by "Plot\_Ex4\_Gap.py" to produce Figure 5 in the Appendix.

(9) "Ex1\_ErrorRate.py" implements the exploration and joint estimation part of EI-TLR on Example 1. It produces the results "Ex1\_range\_epoch\_1.npy", "Ex1\_pre\_est\_err\_mean\_1.npy", "Ex1\_pos\_est\_err\_mean\_1.npy", saved in the "Results/ErrorRate" subfolder, and then used by "Plot\_Ex1\_ErrorRate.py" to produce the left and middle panels of Figure 3 in the main paper.

(10) "Ex2\_ErrorRate.py" implements the exploration and joint estimation part of EI-TLR on Example 2. It produces the results "Ex2\_range\_epoch\_1.npy", "Ex2\_pre\_est\_err\_mean\_1.npy", "Ex2\_pos\_est\_err\_mean\_1.npy", saved in the "Results/ErrorRate" subfolder, and then used by "Plot\_Ex2\_ErrorRate.py" to produce the left and middle panels of Figure 2 in the Appendix.

(11) "Ex3\_ErrorRate.py" implements the exploration and joint estimation part of EI-TLR on Example 3. It produces the results "Ex3\_range\_epoch\_1.npy", "Ex3\_pre\_est\_err\_mean\_1.npy", "Ex3\_pos\_est\_err\_mean\_1.npy", saved in the "Results/ErrorRate" subfolder, and then used by "Plot\_Ex3\_ErrorRate.py" to produce the left and middle panels of Figure 3 in the Appendix.

(12) "Ex1\_RegretRate.py" implements EI-TLR on Example 1 with varying horizon lengths. It produces the results "EI-TLR\_Ex1\_reg\_exp2\_mean\_1.npy" -- "EI-TLR\_Ex1\_reg\_exp2\_mean\_20.npy", saved in the "Results/Ex1\_RegretRate" subfolder, and then used by "Plot\_Ex1\_RegretRate.py" to produce the right panel of Figure 3 in the main paper.

(13) "Ex2\_RegretRate.py" implements EI-TLR on Example 2 with varying horizon lengths. It produces the results "EI-TLR\_Ex2\_reg\_exp2\_mean\_1.npy" -- "EI-TLR\_Ex2\_reg\_exp2\_mean\_20.npy", saved in the "Results/Ex2\_RegretRate" subfolder, and then used by "Plot\_Ex2\_RegretRate.py" to produce the right panel of Figure 2 in the Appendix.

(14) "Ex3\_RegretRate.py" implements EI-TLR on Example 3 with varying horizon lengths. It produces the results "EI-TLR\_Ex3\_reg\_exp2\_mean\_1.npy" -- "EI-TLR\_Ex3\_reg\_exp2\_mean\_20.npy", saved in the "Results/Ex3\_RegretRate" subfolder, and then used by "Plot\_Ex3\_RegretRate.py" to produce the right panel of Figure 3 in the Appendix.

(15) "Ex123\_Subgap.py" calculates and presents sub-optimality gaps for Examples 1 -- 3, thus reproducing results in Table 1 in the Appendix.

(16) "Ex4\_Subgap.py" calculates and presents sub-optimality gaps for varying settings in Examples 4, thus reproducing results in Table 2 in the Appendix.

\*\*\* Note that in (12) -- (14), to save time, "Ex1\_RegretRate.py" (and "Ex2\_RegretRate.py", "Ex3\_RegretRate.py") recommends to implement EI-TLR with different horizon lengths separately, i.e., in a parallel fashion. Thus the parameter  $i$  needs to be manually varied from 0 -- 19.

#### |—— Real\_Application - Folder

(1) Real\_Data - Subfolder - Contain the raw real data and its description.

(2) Pre\_Process - Subfolder

(1) "RealData\_Pre.py" preprocess the raw real data and obtain the covariate "Car\_x.npy" and response "Car\_y.npy".

(2) "L2\_Logistic.py" estimates the ground truth preferences and obtain "Car\_Pre.npy", which serves as the preference " $v$ " vector in the applications of various policies on the real car data.

(3) "Car\_TLR\_UCB.py" implements the proposed TLR-UCB policy on the real car data under known position effects. It produces the results "TLR-UCB\_reg\_mean\_1.npy" -- "TLR-UCB\_reg\_mean\_50.npy", saved in the "Results/TLR\_UCB" subfolder.

(4) "Car\_LR\_UCB.py" implements the LR-UCB policy on the real car data under known position effects. It produces the results "LR-UCB\_reg\_mean\_1.npy" -- "LR-UCB\_reg\_mean\_50.npy", saved in the "Results/LR\_UCB" subfolder.

(5) "Car\_A\_UCB\_V.py" implements the A-UCB-V policy on the real car data under known position effects. It produces the results "A-UCB-V\_reg\_mean\_1.npy" -- "A-UCB-V\_reg\_mean\_50.npy", saved in the "Results/A\_UCB\_V" subfolder.

(6) "Car\_EI\_TLR.py" implements the proposed EI-TLR policy on the real car data under unknown position effects. It produces the results "EI\_TLR\_reg\_mean\_1.npy" -- "EI\_TLR\_reg\_mean\_50.npy", saved in the "Results/EI\_TLR" subfolder.

(7) "Car\_A\_UCB.py" implements the A-UCB policy on the real car data under unknown position effects. It produces the results "A\_UCB\_V\_reg\_mean\_1.npy" -- "A\_UCB\_V\_reg\_mean\_50.npy", saved in the "Results/A\_UCB" subfolder.

(8) "Plot\_Car\_Known.py" uses the results in the subfolders "Results/TLR\_UCB", "Results/LR\_UCB", "Results/A\_UCB\_V" to produce the left panel of Figure 4 in the main paper.

(9) "Plot\_Car\_Unknown.py" uses the results in the subfolders "Results/EI\_TLR", "Results/A\_UCB" to produce the right panel of Figure 4 in the main paper.

\*\*\* Note that in (3) -- (7), due to the long horizon length and large N and K, to save time, it is recommended to implement each policy in a parallel fashion, i.e., one replication each time. Specifically, the parameter  $i$ , which corresponds to the  $i$ -th replication and the used random seed, needs to be manually varied from 0 -- 49 to conduct 50 replications.

\*\*\* Note that unlike in the Simulation folder, the results are not included due to their large size. Therefore, the "Plot..." Python files cannot be directly applied to reproduce the figures.

## # Install Python packages

We use Python 3 to run experiments and plot figures. The Python packages required are listed in `requirements.txt`, and you can install them using the bash command `pip3 install -r requirements.txt`. For more details, please refer to the [official Python tutorial](https://packaging.python.org/en/latest/tutorials/installing-packages/) about installing packages.

The code is tested with Python 3.9.6.

All path-related codes (e.g., `sys.path.append()`, `os.chdir()`) in these Python files need to be adapted to the local environment.

## # Guidelines for Reproducing figures and tables in the main paper and Appendix:

### Main paper:

- (1) Left panel of Figure 1: Run `Ex1_Known`, and then `Plot_Ex1_Known`
- (2) Middle panel of Figure 1: Run `Ex2_Known`, and then `Plot_Ex2_Known`
- (3) Right panel of Figure 1: Run `Ex3_Known`, and then `Plot_Ex3_Known`
- (4) Left panel of Figure 2: Run `Ex1_Unknown`, and then `Plot_Ex1_Unknown`
- (5) Middle panel of Figure 2: Run `Ex2_Unknown`, and then `Plot_Ex2_Unknown`
- (6) Right panel of Figure 2: Run `Ex3_Unknown`, and then `Plot_Ex3_Unknown`
- (7) Left and middle panels of Figure 3: Run `Ex1_ErrorRate`, and then `Plot_Ex1_ErrorRate`
- (8) Right panel of Figure 3: Run `Ex1_RegretRate`, and then `Plot_Ex1_RegretRate`
- (9) Left panel of Figure 4: Run `Car_TLR_UCB`, `Car_LR_UCB`, `Car_A_UCB_V`, and then `Plot_Car_Known`
- (10) Right panel of Figure 4: Run `Car_EI_TLR`, `Car_A_UCB`, and then `Plot_Car_Unknown`

### Appendix:

- (1) Figure 1: Run Ex1\_Sensitivity, and then Plot\_Ex1\_Sensitivity
- (2) Left and middle panels of Figure 2: Run Ex2\_ErrorRate, and then Plot\_Ex2\_ErrorRate
- (3) Right panel of Figure 2: Run Ex2\_RegretRate, and then Plot\_Ex2\_RegretRate
- (4) Left and middle panels of Figure 3: Run Ex3\_ErrorRate, and then Plot\_Ex3\_ErrorRate
- (5) Right panel of Figure 3: Run Ex3\_RegretRate, and then Plot\_Ex3\_RegretRate
- (6) Figure 4: Exactly Figure 1 in the main paper + left panel of Figure 4 in the main paper
- (7) Figure 5: Run Ex4\_Gap, and then Plot\_Ex4\_Gap
- (8) Table 1: Run Ex123\_Subgap
- (9) Table 2: Run Ex4\_Subgap
